# Supplementary material
Source: PubMed Central journal article supplement (PMC3833390)
Supplement: Supp_Fig1.pdf [file Supp_Fig1.pdf]

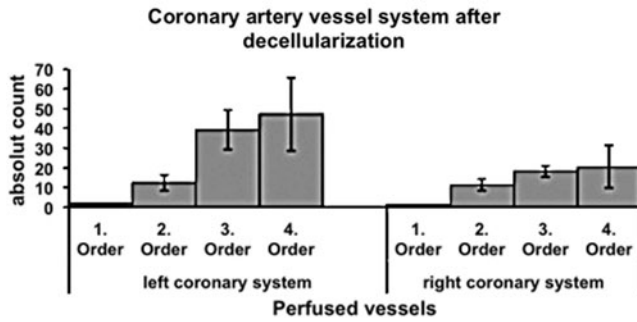

**SUPPLEMENTARY FIG. S1.** Patency of the coronary artery vessel system of *in toto* decellularized hearts. *In toto* decellularized rat hearts were perfused with epoxide resin through retrograde aortic perfusion and subsequently desiccated for visualization of the coronary artery system. Perfused vessels were individually counted for the respective left and right coronary system of each heart up to ramifications of the 4th order. ( $n=4$ ; mean  $\pm$  SD).
